# Supplementary material for: Extracting Diffusive States of Rho GTPase in Live Cells: Towards In Vivo Biochemistry
Source: PubMed Central journal article supplement (PMC4626024; doi:10.1371/journal.pcbi.1004297), 2015-10-29
Supplement: pcbi.1004297.s003.pdf [file pcbi.1004297.s003.pdf]

**S2 Table. CDF parameter estimates for synthetic particle trajectories.**  $D^{sim}$  and  $\pi^{sim}$  represent the parameters used to simulate 10,000 synthetic protein trajectories with motion blur and a constant static localization noise,  $\sigma^{sim} = 0.05 \mu\text{m}$ , with diffusivities and population fractions given according to case 1 and case 2. The cumulative distribution function (CDF) parameter estimates are determined by applying a non-linear least squares fit to the cumulative square displacements,  $\Delta r^2 = \Delta x^2 + \Delta y^2$ , across the population of synthetic protein trajectories according to [30]:  $CDF(\Delta r^2) = 1 - \left( \sum_{k=1}^K \pi_k e^{-\Delta r^2 / (2\rho_k)} \right)$ , where  $\rho_k = 2D_k\Delta t + 2\sigma^2 - 4RD_k\Delta t$ ,  $\{D_k\}$  are the diffusion coefficients, and  $\{\pi_k\}$  are the population fractions which satisfy the normalization,  $\sum_{k=1}^K \pi_k = 1$ . Here,  $\rho_k$  and  $\pi_k$  are the free parameters and the normalization constraint for  $\pi_k$  is enforced by replacing the population fraction of the  $K$ th diffusive state,  $\pi_k$ , with  $1 - \sum_{i=1}^{K-1} \pi_i$ . The fit is applied over the range 0 to  $\infty$ .  $D_{CDF}$  and  $\pi_{CDF}$  represent the CDF values from fitting the cumulative square displacements of the synthetic protein trajectories when using the simulated values as the initial guess and a known static localization noise (S3 Fig.).  $D_{true}$  and  $\pi_{true}$  represent the CDF estimates when applied to the same protein trajectories, but without localization noise, and using the simulated values as the initial guess. Units of  $D$ ,  $\mu\text{m}^2\text{s}^{-1}$ .

|              | Case 1 |       |      |      | Case 2 |      |      |      |
|--------------|--------|-------|------|------|--------|------|------|------|
| $D_{sim}$    | 0.01   | 0.3   | 1.2  | 2.8  | 0.03   | 0.1  | 0.25 | 0.45 |
| $D_{CDF}$    | 0.031  | 0.056 | 0.21 | 1.12 | 0.03   | 0.04 | 0.10 | 0.35 |
| $D_{true}$   | 0.01   | 0.28  | 1.22 | 3.71 | 0.01   | 0.08 | 0.31 | 0.73 |
| $\pi_{sim}$  | 0.2    | 0.3   | 0.4  | 0.1  | 0.2    | 0.1  | 0.4  | 0.3  |
| $\pi_{CDF}$  | 0.08   | 0.19  | 0.39 | 0.35 | 0.06   | 0.13 | 0.35 | 0.46 |
| $\pi_{true}$ | 0.37   | 0.24  | 0.27 | 0.12 | 0.39   | 0.16 | 0.27 | 0.18 |
