# Supplementary material for: Extracting Diffusive States of Rho GTPase in Live Cells: Towards In Vivo Biochemistry
Source: PubMed Central journal article supplement (PMC4626024; doi:10.1371/journal.pcbi.1004297), 2015-10-29
Supplement: pcbi.1004297.s004.pdf [file pcbi.1004297.s004.pdf]

**S3 Table. Numbers of Rho protein trajectories used for pEM analysis.**

|                 | Number of cells | Number of trajectories |
|-----------------|-----------------|------------------------|
| RhoA            | 5               | 7329                   |
| RhoA G14V       | 7               | 6246                   |
| RhoA F30L       | 4               | 6293                   |
| RhoA T19N       | 5               | 15969                  |
| RhoA HV         | 6               | 10304                  |
| RhoC            | 8               | 9104                   |
| RhoC G14V       | 3               | 7655                   |
| RhoC F30L       | 4               | 25074                  |
| RhoC T19N       | 2               | 6572                   |
| RhoC HV         | 4               | 10742                  |
| RhoC Chimera HV | 4               | 14274                  |
