# Supplementary material for: Extracting Diffusive States of Rho GTPase in Live Cells: Towards In Vivo Biochemistry
Source: PubMed Central journal article supplement (PMC4626024; doi:10.1371/journal.pcbi.1004297), 2015-10-29
Supplement: pcbi.1004297.s018.pdf [file pcbi.1004297.s018.pdf]

## S2 Text

### Derivation of likelihood framework for diffusive states

The likelihood of observing an individual protein trajectory with  $N$  one-dimensional (1D) displacements,  $\Delta \mathbf{x} = \{\Delta x(n)\}_{n=1}^N$ , separated by  $\Delta t$ , in a diffusive state with a covariance matrix,  $\Sigma$ , is given by a multivariate Gaussian distribution: [34]

$$P(\Delta \mathbf{x}|\Sigma) = \frac{1}{(2\pi)^{N/2}|\Sigma|^{1/2}} \exp\left[-\frac{1}{2}\Delta \mathbf{x}^T \Sigma^{-1} \Delta \mathbf{x}\right],$$

where  $\Delta \mathbf{x}^T$  is the transpose,  $|\Sigma|$  is the determinant, and  $\Sigma^{-1}$  is the inverse. Explicitly, the covariance matrix for a protein undergoing normal diffusion is given by: [34]

$$\Sigma_{ij} = \begin{cases} 2D\Delta t + 2\sigma^2 - 4RD\Delta t & i = j \\ -\sigma^2 + 2RD\Delta t & i = j \pm 1 \\ 0 & \text{otherwise} \end{cases}$$

where  $D$  is the diffusion coefficient,  $\sigma$  is the static localization noise, and  $R$  is the motion blur coefficient [19], which depends on the shutter state during the camera integration time. For a shutter that is open throughout  $\Delta t$ , as we assume in this paper,  $R = \frac{1}{6}$ .

Thus the complete likelihood of observing  $M$  protein trajectories,  $\Delta \hat{\mathbf{x}} = \{\Delta \mathbf{x}_m\}_{m=1}^M$ , in this same diffusive state is given by the product of the individual protein trajectory likelihoods, according to  $P(\Delta \hat{\mathbf{x}}|\Sigma) = \prod_{m=1}^M P(\Delta \mathbf{x}_m|\Sigma)$ . However, this assumes that all of the protein trajectories are homogeneous, sharing the same covariance matrix.

We can extend the likelihood of individual protein trajectories to include multiple diffusive states with a Gaussian mixture model [36]. When there are  $K$  diffusive states each characterized by a different  $\Sigma_k$ , the formulation for the complete likelihood for the a population of protein trajectories is simplified by introducing a hidden variable,  $\mathbf{z}$ , which corresponds to an indicator of the underlying diffusive state.  $\mathbf{z}$  is a  $K$ -dimensional binary random variable which has one element equal to 1 corresponding to the underlying diffusive state and the other elements are equal to 0,  $\mathbf{z} = \{z_m(k)\}_{k=1}^K$ .

In this representation, the likelihood distribution of the  $m$ th protein trajectory can be given by marginalizing the joint distribution,  $P(\Delta \mathbf{x}_m, \mathbf{z}_m|\hat{\Sigma})$ , over the hidden variable,  $\mathbf{z}$ , according to:

$$\begin{aligned} P(\Delta \mathbf{x}_m|\hat{\Sigma}) &= \sum_{z=1}^K P(\Delta \mathbf{x}_m, \mathbf{z}_m|\hat{\Sigma}) \\ &= \sum_{z=1}^K P(\mathbf{z}_m|\hat{\Sigma})P(\Delta \mathbf{x}_m|\mathbf{z}_m, \hat{\Sigma}), \end{aligned} \quad (\text{Eq. S2})$$

where  $\hat{\Sigma} = \{\Sigma_k\}_{k=1}^K$ .

For protein trajectory  $m$ , we define the probability of a particular diffusive state is given by  $P(z_m(k) = 1) = \pi_k$ , which we call the population fraction with properties  $0 \leq \pi_k \leq 1$  and normalization  $\sum_{k=1}^K \pi_k = 1$ . Thus, the probability over the hidden variables across all states given the  $P(\mathbf{z}_m|\hat{\Sigma})$ , can be expressed in the form:

$$P(\mathbf{z}_m|\hat{\Sigma}) = P(\mathbf{z}_m) = \prod_{k=1}^K \pi_k^{z_m(k)}. \quad (\text{Eq. S3})$$

Since the likelihood of  $\Delta \mathbf{x}_m$  given a particular value for  $\mathbf{z}_m$  is the same as the likelihood for an individual protein trajectory, *i.e.*  $P(\Delta \mathbf{x}_m|z_m(k) = 1, \hat{\Sigma}) = P(\Delta \mathbf{x}_m|\Sigma_k)$ , the full conditional probability can then be written in the form:

$$P(\Delta \mathbf{x}_m|\mathbf{z}_m, \hat{\Sigma}) = \prod_{k=1}^K [P(\Delta \mathbf{x}|\Sigma_k)]^{z_m(k)}. \quad (\text{Eq. S4})$$

Substituting Eq. S3 and Eq. S4 into Eq. S2, the marginal distribution of  $\Delta \mathbf{x}_m$  becomes:

$$\begin{aligned}
P(\Delta \mathbf{x}_m | \hat{\Sigma}) &= \sum_{k=1}^K P(\mathbf{z}_m(k) | \hat{\Sigma}) P(\Delta \mathbf{x}_m | \mathbf{z}_m(k), \hat{\Sigma}) \\
&= \sum_{k=1}^K \left( \prod_{k=1}^K \pi_k^{z_m(k)} \right) \left( \prod_{k=1}^K [P(\Delta \mathbf{x}_m | \Sigma_k)]^{z_m(k)} \right) \\
&= \sum_{k=1}^K \pi_k P(\Delta \mathbf{x}_m | \Sigma_k).
\end{aligned}$$

Thus, the marginal distribution of  $\Delta \mathbf{x}_m$  is a mixture of  $K$  multivariate Gaussians of individual protein trajectory likelihoods for each diffusive state. For  $M$  protein trajectories, the complete likelihood is given with a product of these Gaussian mixtures for each protein trajectory:

$$\mathcal{L}(\Delta \hat{\mathbf{x}} | \hat{\boldsymbol{\pi}}, \hat{\Sigma}) = \prod_{m=1}^M \sum_{k=1}^K \pi_k P(\Delta \mathbf{x}_m | \Sigma_k).$$

where  $\hat{\boldsymbol{\pi}} = \{\pi_k\}_{k=1}^K$ . Equivalently, the complete log-likelihood function:

$$\ln \mathcal{L}(\Delta \hat{\mathbf{x}} | \hat{\boldsymbol{\pi}}, \hat{\Sigma}) = \sum_{m=1}^M \ln \left\{ \sum_{k=1}^K \pi_k P(\Delta \mathbf{x}_m | \Sigma_k) \right\}.$$

### Derivation of $D_k$ and $\sigma_k$

To find the maximization relations for  $D_k$  and  $\sigma_k$ , we first maximize the log-likelihood (Eq. 1) with respect to  $\Sigma_k$ , according to  $\frac{\partial \ln \mathcal{L}}{\partial \Sigma_k} = 0$ .

$$\begin{aligned}
0 &= \frac{\partial}{\partial \Sigma_k} \ln \mathcal{L}(\Delta \hat{\mathbf{x}} | \hat{\boldsymbol{\pi}}, \hat{\Sigma}) \\
&= \frac{\partial}{\partial \Sigma_k} \sum_{m=1}^M \ln \left\{ \sum_{k=1}^K \pi_k P(\Delta \mathbf{x}_m | \Sigma_k) \right\} \\
&= \sum_{m=1}^M \frac{\pi_k \frac{\partial}{\partial \Sigma_k} P(\Delta \mathbf{x}_m | \Sigma_k)}{\sum_{j=1}^K \pi_j P(\Delta \mathbf{x}_m | \Sigma_j)} \\
&= \sum_{m=1}^M \frac{\pi_k P(\Delta \mathbf{x}_m | \Sigma_k)}{\sum_{j=1}^K \pi_j P(\Delta \mathbf{x}_m | \Sigma_j)} \left( -\frac{1}{2} \right) [\Sigma_k^{-1} - \Sigma_k^{-1} \Delta \mathbf{x}_m \Delta \mathbf{x}_m^T \Sigma_k^{-1}] \\
&= \sum_{m=1}^M \gamma_{mk} [\Sigma_k^{-1} - \Sigma_k^{-1} \Delta \mathbf{x}_m \Delta \mathbf{x}_m^T \Sigma_k^{-1}] \\
\sum_{m=1}^M \gamma_{mk} \Sigma_k &= \sum_{m=1}^M \gamma_{mk} \Delta \mathbf{x}_m \Delta \mathbf{x}_m^T \\
M_k \Sigma_k &= \sum_{m=1}^M \gamma_{mk} \Delta \mathbf{x}_m \Delta \mathbf{x}_m^T \\
\Sigma_k &= \frac{1}{M_k} \sum_{m=1}^M \gamma_{mk} \Delta \mathbf{x}_m \Delta \mathbf{x}_m^T, \tag{Eq. S5}
\end{aligned}$$

where  $\gamma_{mk} = \frac{\pi_k P(\Delta \mathbf{x}_m | \Sigma_k)}{\sum_{j=1}^K \pi_j P(\Delta \mathbf{x}_m | \Sigma_j)}$ , and  $M_k = \sum_{m=1}^M \gamma_{mk}$ . Interestingly,  $\gamma_{mk}$  follows directly from Bayes' theorem, given by:

$$\begin{aligned} \gamma_{mk} &= P(\mathbf{z}_m(k) = 1 | \Delta \mathbf{x}_m, \hat{\Sigma}) \\ &= \frac{P(\mathbf{z}_m(k) = 1 | \hat{\Sigma}) P(\Delta \mathbf{x}_m | \mathbf{z}_m(k) = 1, \hat{\Sigma})}{\sum_{j=1}^K P(\mathbf{z}_m(j) = 1 | \hat{\Sigma}) P(\Delta \mathbf{x}_m | \mathbf{z}_m(j) = 1, \hat{\Sigma})} \\ &= \frac{\pi_k P(\Delta \mathbf{x}_m | \Sigma_k)}{\sum_{j=1}^K \pi_j P(\Delta \mathbf{x}_m | \Sigma_j)}, \end{aligned}$$

To determine the maximized forms of  $D_k$  from  $\Sigma_k$ , we equate the maximized covariance matrix (Eq. S5) with the theoretical covariance matrix (Eq. 3) in a manner similar to the covariance-based estimator [49]. It is useful to equate the diagonal elements and the first off-diagonal elements separately. Equating the diagonal elements of the theoretical covariance matrix, which is equal to  $2D_k \Delta t + 2\sigma_k^2 - 4RD_k \Delta t$ , to the mean diagonal elements of the maximized  $\Sigma_k$  yields:

$$\begin{aligned} \text{diag}[\Sigma_k] &= \left\langle \text{diag} \left[ \frac{1}{M_k} \sum_{m=1}^M \gamma_{mk} \Delta \mathbf{x}_m \Delta \mathbf{x}_m^T \right] \right\rangle \\ 2D_k \Delta t + 2\sigma_k^2 - 4RD_k \Delta t &= \left\langle \frac{1}{M_k} \sum_{m=1}^M \gamma_{mk} \text{diag} [\Delta \mathbf{x}_m \Delta \mathbf{x}_m^T] \right\rangle \\ 2D_k \Delta t + 2\sigma_k^2 - 4RD_k \Delta t &= \frac{1}{M_k} \sum_{m=1}^M \gamma_{mk} \langle \text{diag} [\Delta \mathbf{x}_m \Delta \mathbf{x}_m^T] \rangle \\ 2D_k \Delta t + 2\sigma_k^2 - 4RD_k \Delta t &= \frac{1}{M_k} \sum_{m=1}^M \gamma_{mk} \langle \Delta x_m(n)^2 \rangle \end{aligned} \quad (\text{Eq. S6})$$

where  $\langle \Delta x_m(n)^2 \rangle = \frac{1}{N_m} \sum_{n=1}^{N_m} \Delta x_m(n)^2$  represents the mean of the  $N_m$  displacements square for protein trajectory  $m$ , and  $\Delta \mathbf{x}_m = \{\Delta x_m(n)\}_{n=1}^{N_m}$ .

Similarly, equating the nearest-neighbor covariance of the theoretical covariance matrix, which is equal to  $-\sigma_k^2 - 2RD_k \Delta t$ , to the mean nearest-neighbor covariance of the maximized covariance matrix,  $\text{corr}[\Sigma_k]_{n,n+1}$ , yields:

$$\begin{aligned} \text{corr}[\Sigma_k]_{n,n+1} &= \left\langle \text{corr} \left[ \frac{1}{M_k} \sum_{m=1}^M \gamma_{mk} \Delta \mathbf{x}_m \Delta \mathbf{x}_m^T \right]_{n,n+1} \right\rangle \\ -\sigma_k^2 + 2RD_k \Delta t &= \left\langle \frac{1}{M_k} \sum_{m=1}^M \gamma_{mk} \text{corr} [\Delta \mathbf{x}_m \Delta \mathbf{x}_m^T]_{n,n+1} \right\rangle \\ -\sigma_k^2 + 2RD_k \Delta t &= \frac{1}{M_k} \sum_{m=1}^M \gamma_{mk} \langle \text{corr} [\Delta \mathbf{x}_m \Delta \mathbf{x}_m^T]_{n,n+1} \rangle \\ -\sigma_k^2 + 2RD_k \Delta t &= \frac{1}{M_k} \sum_{m=1}^M \gamma_{mk} \langle \Delta x_m(n) \Delta x_m(n+1) \rangle \end{aligned} \quad (\text{Eq. S7})$$

where  $\langle \Delta x_m(n) \Delta x_m(n+1) \rangle = \frac{1}{N_m-1} \sum_{n=1}^{N_m-1} \Delta x_m(n) \Delta x_m(n+1)$  is the mean correlation between nearest neighbor displacements for protein trajectory  $m$ .

Using the relations for the diagonal terms (Eq. S6) and off-diagonal terms (Eq. S7), the maximized diffusivity estimates for diffusive state  $k$  can be solved according to:

$$\begin{aligned}
2D_k\Delta t &= \text{diag}[\mathbf{\Sigma}_k] + 2 \text{corr}[\mathbf{\Sigma}_k]_{n,n+1} \\
2D_k\Delta t &= \frac{1}{M_k} \sum_{m=1}^M \gamma_{mk} \langle \Delta x_m(n)^2 \rangle + \frac{2}{M_k} \sum_{m=1}^M \gamma_{mk} \langle \Delta x_m(n) \Delta x_m(n+1) \rangle \\
2D_k\Delta t &= \frac{1}{M_k} \sum_{m=1}^M \gamma_{mk} (\langle \Delta x_m(n)^2 \rangle + 2 \langle \Delta x_m(n) \Delta x_m(n+1) \rangle) \\
D_k &= \frac{1}{2\Delta t M_k} \sum_{m=1}^M \gamma_{mk} (\langle \Delta x_m(n)^2 \rangle + 2 \langle \Delta x_m(n) \Delta x_m(n+1) \rangle) \tag{Eq. S8}
\end{aligned}$$

Analogously, the maximized static localization noise estimates for diffusive state  $k$  can be solved by substituting Eq. S8 into Eq. S6, and solving for  $\sigma_k^2$  according to:

$$\begin{aligned}
2D_k\Delta t + 2\sigma_k^2 - 4RD_k\Delta t &= \frac{1}{M_k} \sum_{m=1}^M \gamma_{mk} \langle \Delta x_m(n)^2 \rangle \\
\sigma_k^2 &= \frac{1}{2M_k} \sum_{m=1}^M \gamma_{mk} \langle \Delta x_m(n)^2 \rangle - D_k\Delta t(1 - 2R),
\end{aligned}$$

where the square root of  $\sigma_k^2$  gives the static localization noise.

The covariance-based maximization equations for  $D_k$  and  $\sigma_k$  represent the posterior-weighted average of the covariance-based estimators for each diffusive state across the population of protein trajectories. It should be noted that the covariance-based estimator was shown to be nearly optimal and unbiased when analyzing protein trajectories on an track-by-track basis [49].

## Derivation of $\pi_k$

To find  $\pi_k$ , we maximize the log-likelihood (Eq. 1) with respect to  $\pi_k$  subject to the constraint that  $\sum_{k=1}^K \pi_k = 1$ , which we implemented via a Lagrange multiplier,  $\lambda$ .

$$\begin{aligned}
0 &= \frac{\partial}{\partial \pi_k} \left[ \ln \mathcal{L}(\Delta \hat{\mathbf{x}} | \hat{\boldsymbol{\pi}}, \hat{\boldsymbol{\Sigma}}) + \lambda \left( \sum_{k=1}^K \pi_k - 1 \right) \right] \\
&= \sum_{m=1}^M \frac{\partial}{\partial \pi_k} \left[ \ln \left\{ \sum_{k=1}^K \pi_k P(\Delta \mathbf{x}_m | \boldsymbol{\Sigma}_k) \right\} \right] + \lambda \frac{\partial}{\partial \pi_k} \left[ \left( \sum_{k=1}^K \pi_k - 1 \right) \right] \\
&= \sum_{m=1}^M \frac{P(\Delta \mathbf{x}_m | \boldsymbol{\Sigma}_k)}{\sum_{j=1}^K \pi_j P(\Delta \mathbf{x}_m | \boldsymbol{\Sigma}_j)} + \lambda \\
\lambda &= - \sum_{m=1}^M \frac{P(\Delta \mathbf{x}_m | \boldsymbol{\Sigma}_k)}{\sum_{k=1}^K \pi_k P(\Delta \mathbf{x}_m | \boldsymbol{\Sigma}_k)} \\
\sum_{k=1}^K \pi_k \lambda &= - \sum_{k=1}^K \pi_k \sum_{m=1}^M \frac{P(\Delta \mathbf{x}_m | \boldsymbol{\Sigma}_k)}{\sum_{j=1}^K \pi_j P(\Delta \mathbf{x}_m | \boldsymbol{\Sigma}_j)} \\
\lambda &= - \sum_{m=1}^M \frac{\sum_{k=1}^K \pi_k P(\Delta \mathbf{x}_m | \boldsymbol{\Sigma}_k)}{\sum_{j=1}^K \pi_j P(\Delta \mathbf{x}_m | \boldsymbol{\Sigma}_j)} \\
\lambda &= - \sum_{m=1}^M 1 \\
\lambda &= -M.
\end{aligned}$$

Substituting  $\lambda$  back in to the maximized equation and solving for  $\pi_k$ , we find:

$$\begin{aligned}
0 &= \sum_{m=1}^M \frac{P(\Delta \mathbf{x}_m | \boldsymbol{\Sigma}_k)}{\sum_{j=1}^K \pi_j P(\Delta \mathbf{x}_m | \boldsymbol{\Sigma}_j)} + \lambda \\
M &= \sum_{m=1}^M \frac{P(\Delta \mathbf{x}_m | \boldsymbol{\Sigma}_k)}{\sum_{j=1}^K \pi_j P(\Delta \mathbf{x}_m | \boldsymbol{\Sigma}_j)} \\
\pi_k M &= \sum_{m=1}^M \frac{\pi_k P(\Delta \mathbf{x}_m | \boldsymbol{\Sigma}_k)}{\sum_{j=1}^K \pi_j P(\Delta \mathbf{x}_m | \boldsymbol{\Sigma}_j)} \\
\pi_k M &= \sum_{m=1}^M \gamma_{mk} \\
\pi_k &= \frac{M_k}{M},
\end{aligned}$$

where  $M_k = \sum_{m=1}^M \gamma_{mk}$ .
