# Supplementary material for: Extracting Diffusive States of Rho GTPase in Live Cells: Towards In Vivo Biochemistry
Source: PubMed Central journal article supplement (PMC4626024; doi:10.1371/journal.pcbi.1004297), 2015-10-29
Supplement: pcbi.1004297.s025.pdf [file pcbi.1004297.s025.pdf]

## S9 Text: Supporting information references

67. Einstein A (1956) Investigations on the Theory of the Brownian Movement. Courier Dover Publications.
68. Metzler R, Jeon JH (2012) The role of ergodicity in anomalous stochastic processes: analysis of single-particle trajectories. *Physica Scripta* 86: 058510.
69. Jeon JH, Metzler R (2010) Analysis of short subdiffusive time series: scatter of the time-averaged mean-squared displacement. *Journal of Physics A: Mathematical and Theoretical* 43: 252001.
70. Voisinne G, Alexandrou A, Masson JB (2010) Quantifying biomolecule diffusivity using an optimal Bayesian method. *Biophysical Journal* 98: 596–605.
71. Bel G, Barkai E (2005) Weak ergodicity breaking in the continuous-time random walk. *Physical Review Letters* 94: 240602.
